# Supplementary material
Source: MDPI journal article supplement (https://www.mdpi.com/2311-5637/7/3/181)
Supplement: s1 [file s1]

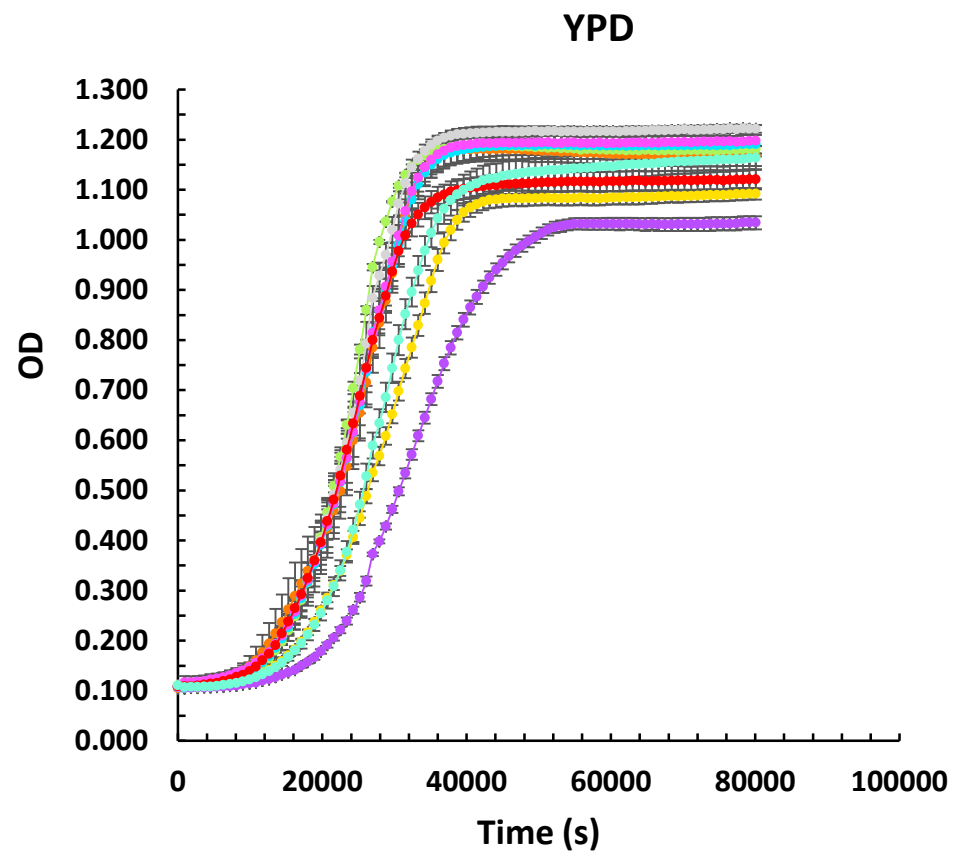

- T73
- EC11 18
- M2
- L205 6
- 71B
- BQS2 52
- EYS5
- Cinta Rojo
- ERS1

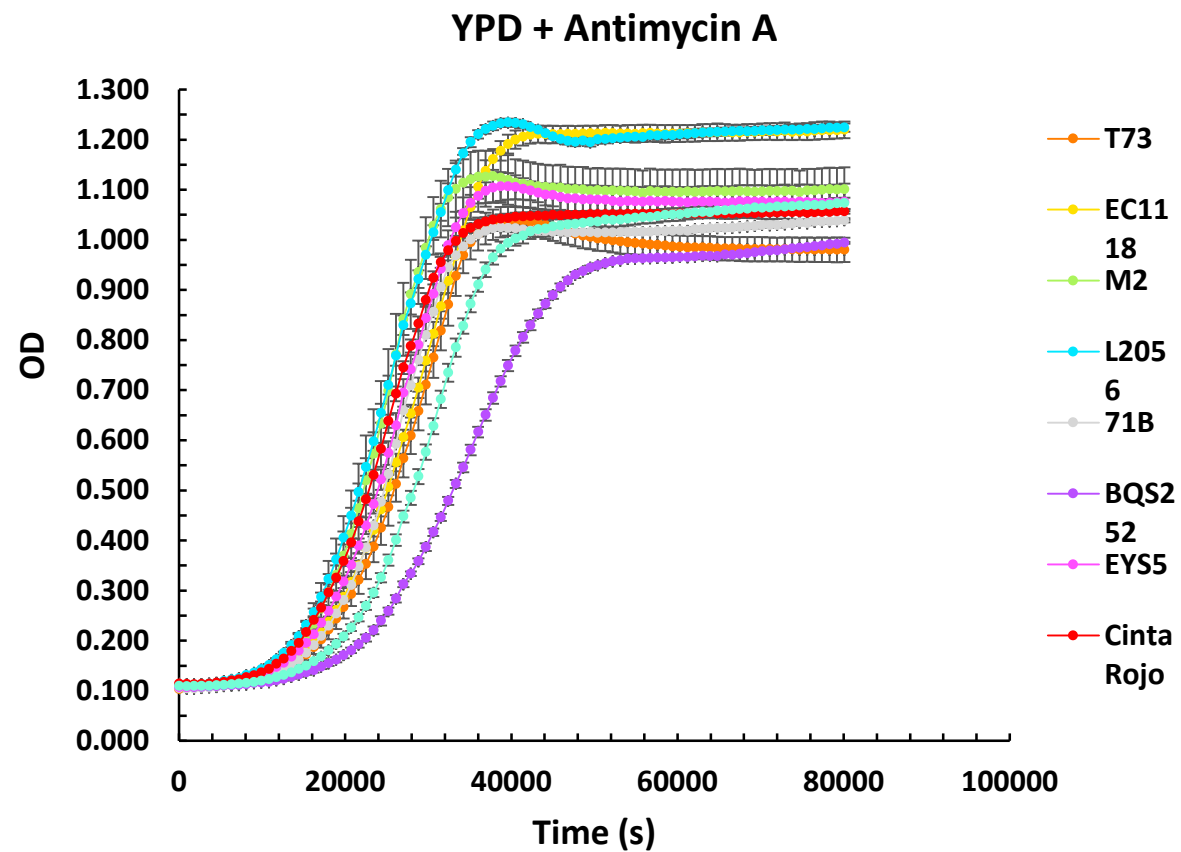

- T73
- EC11 18
- M2
- L205 6
- 71B
- BQS2 52
- EYS5
- Cinta Rojo

YPS

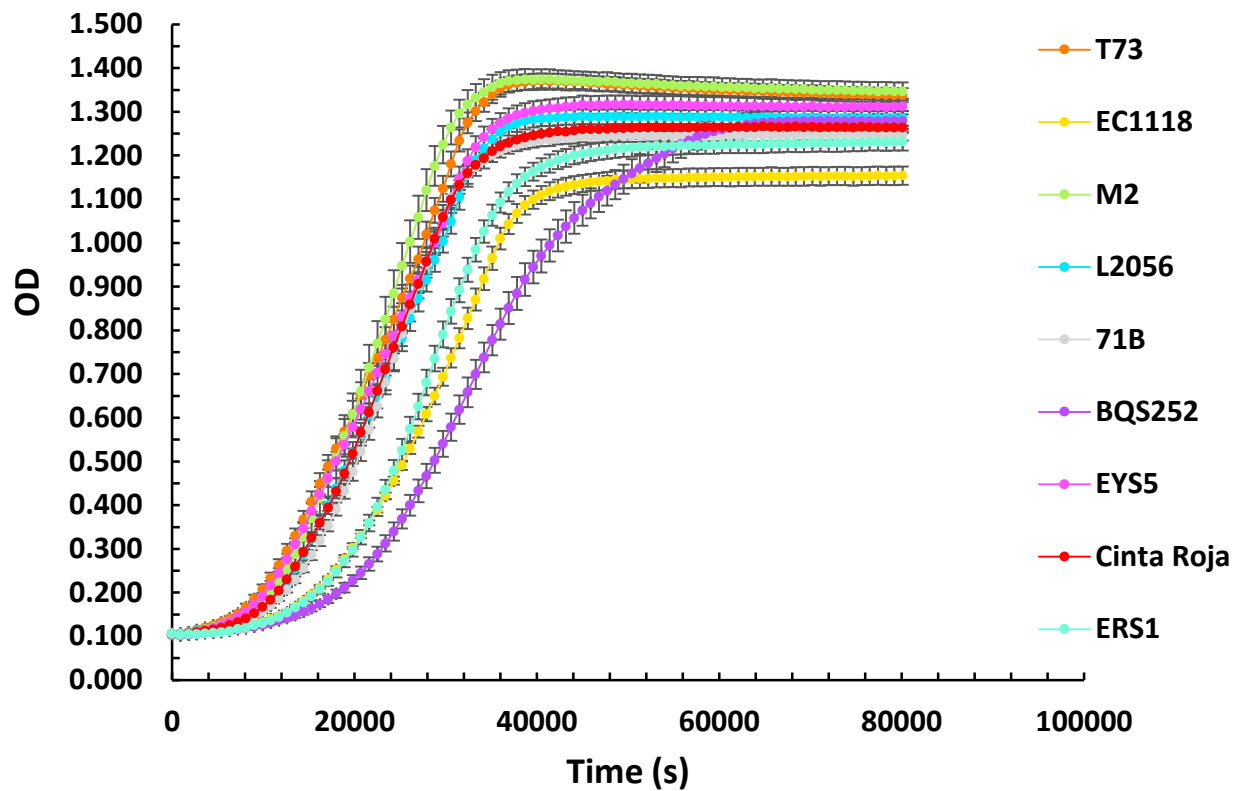

YPS+ antimycin A

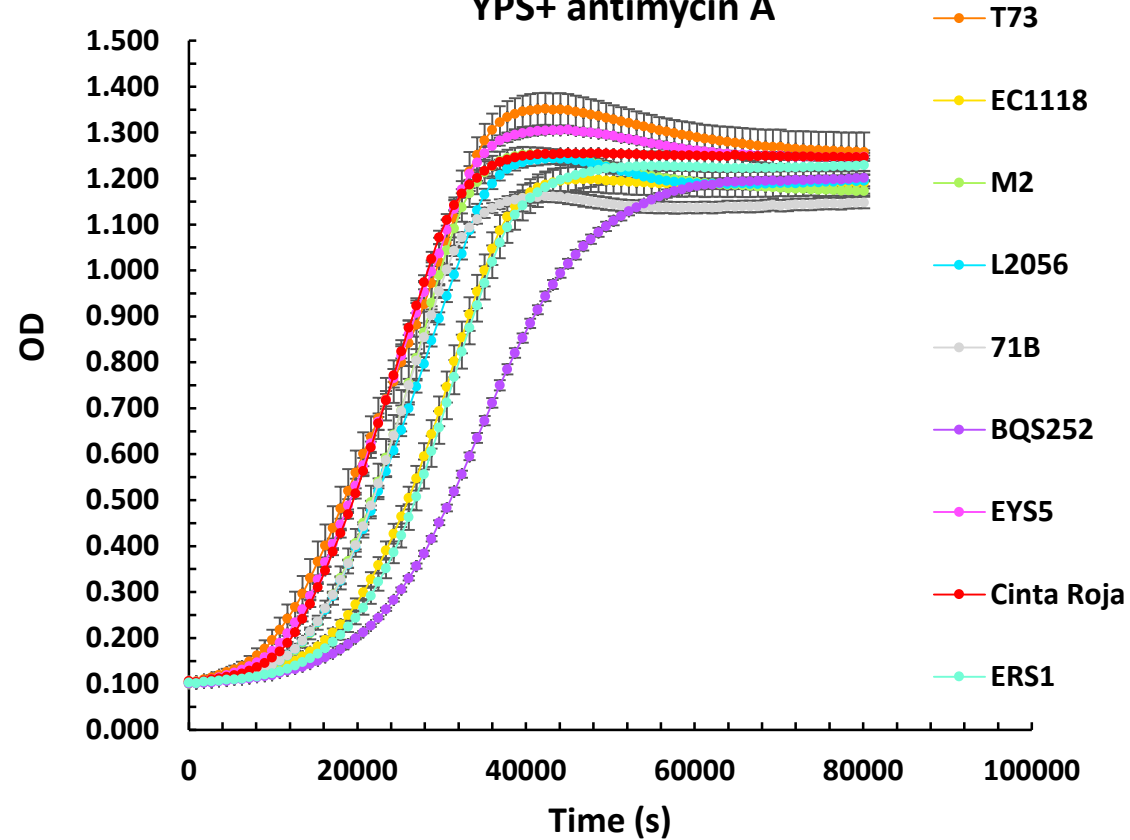

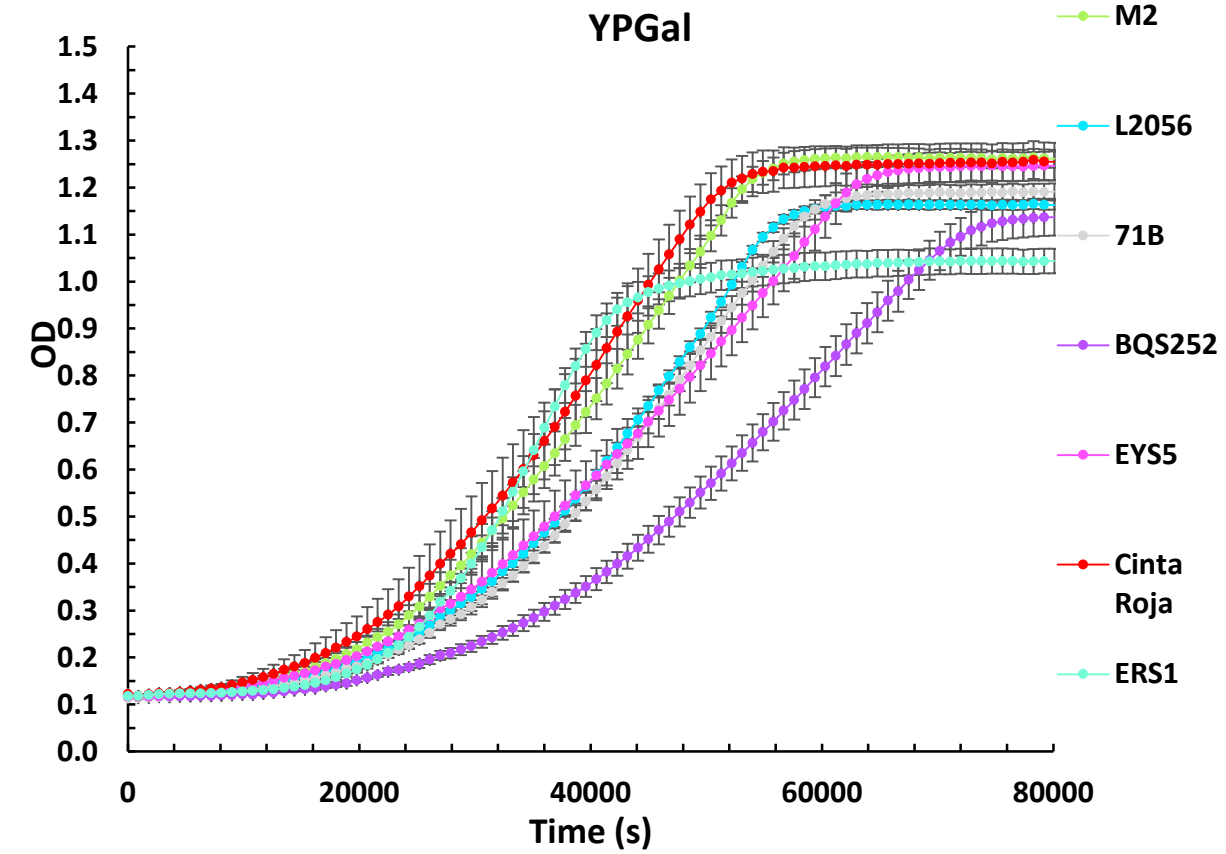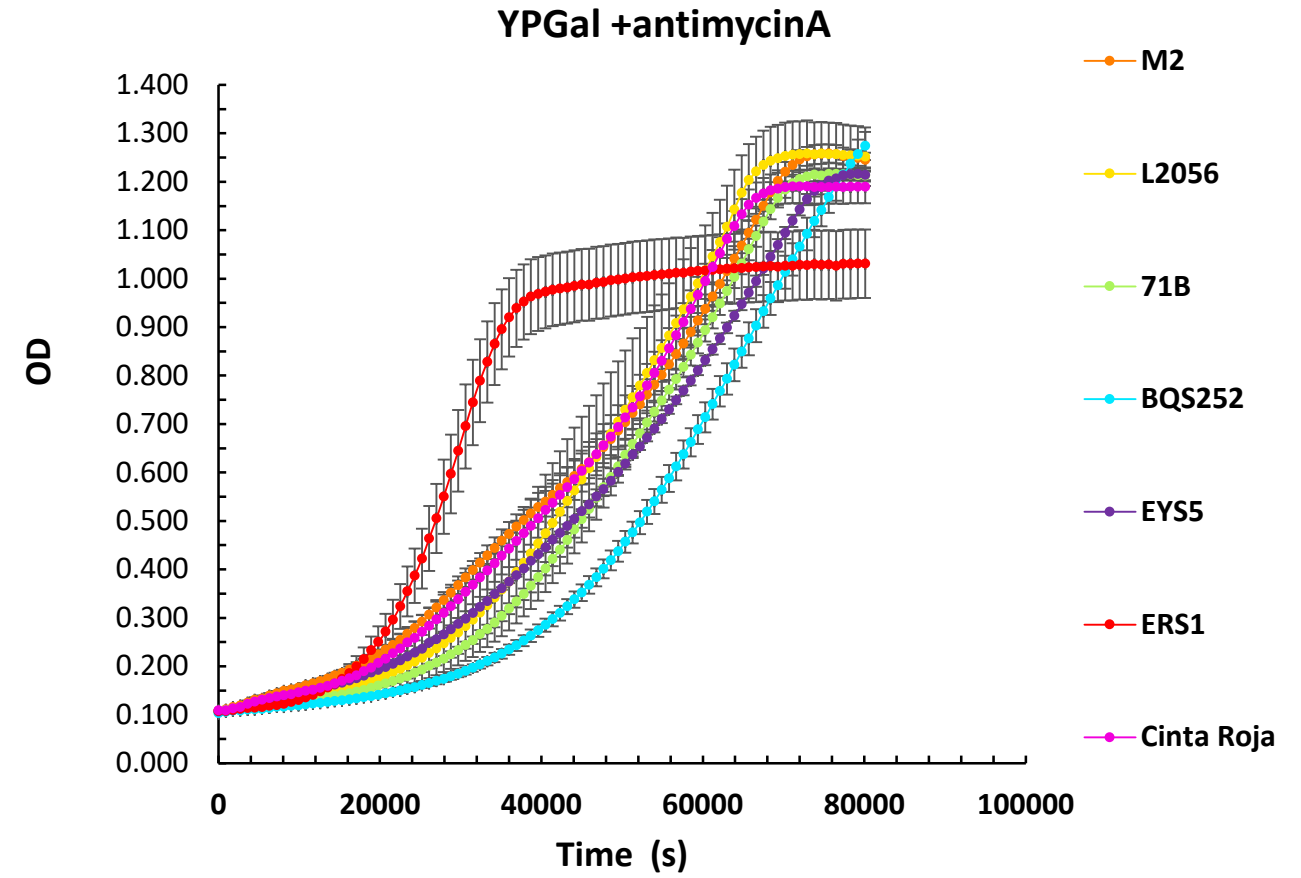

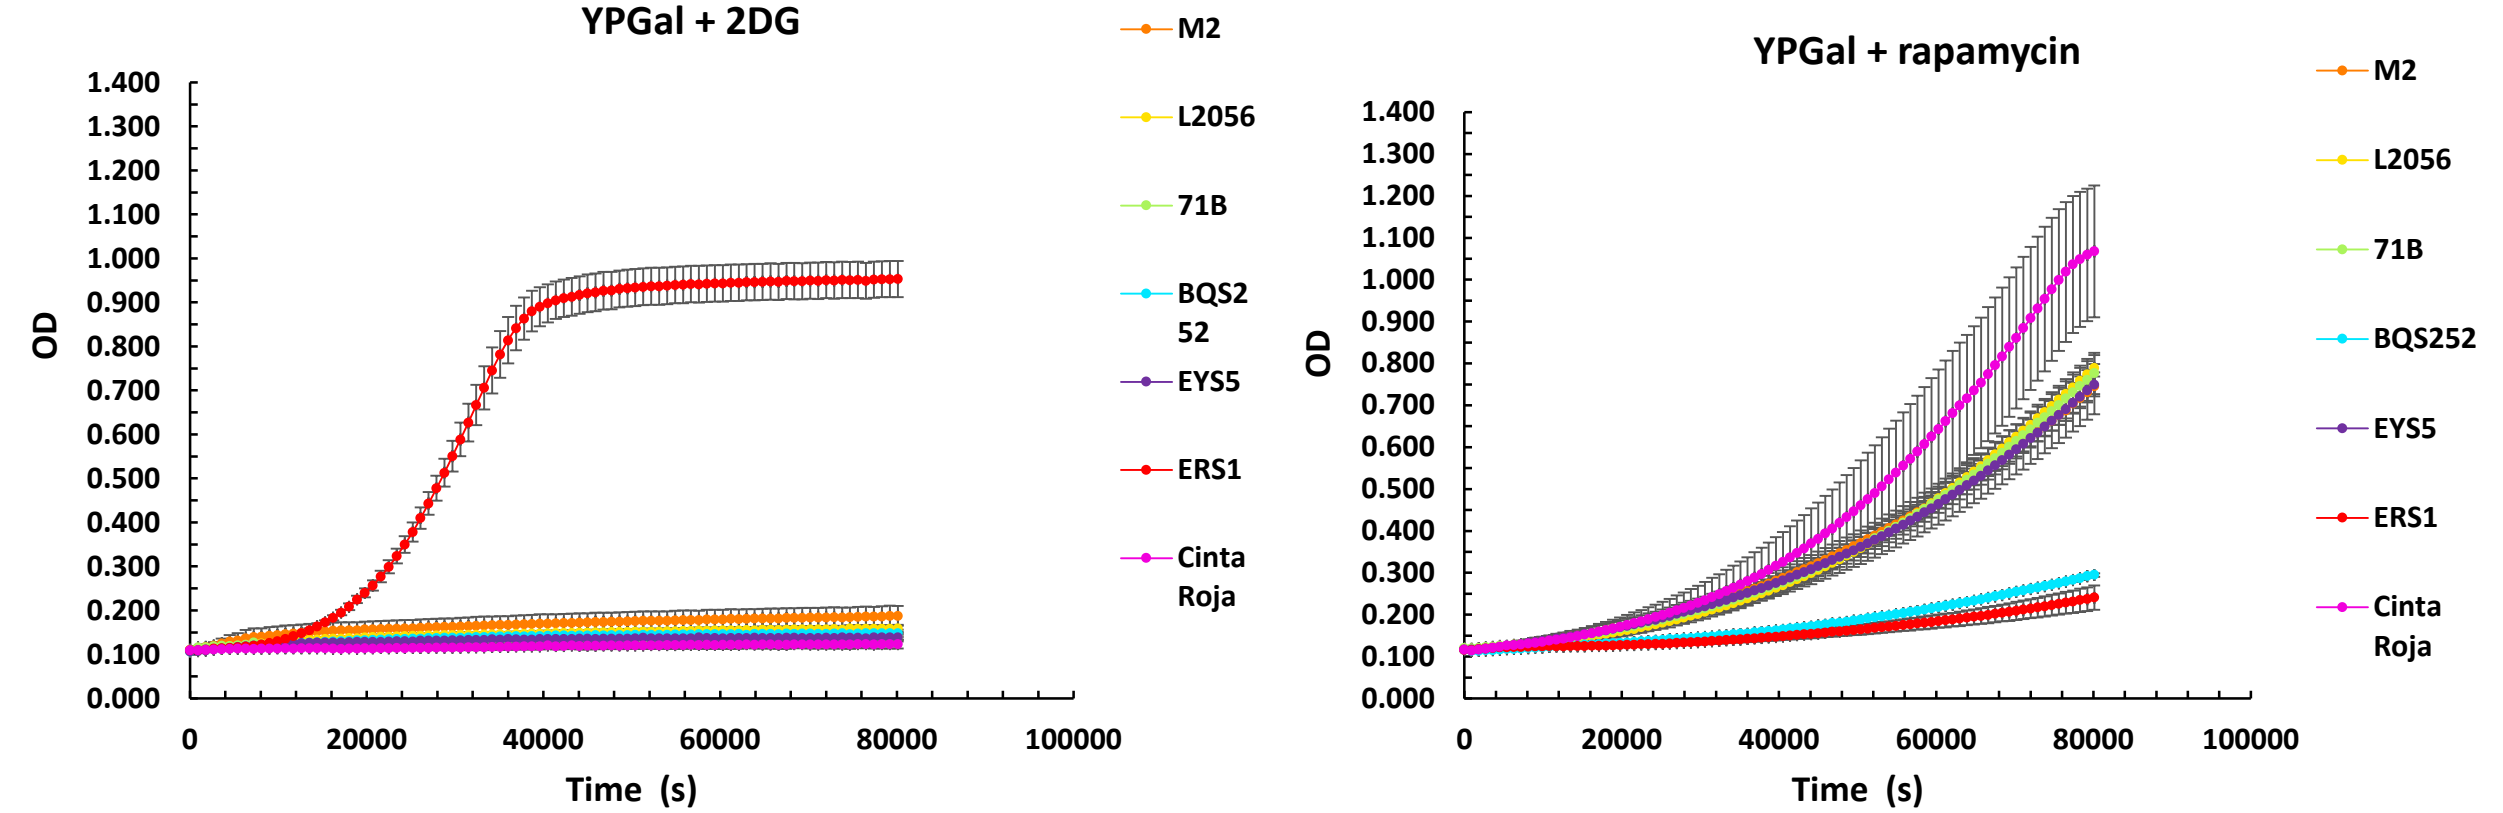

**Supplementary Figure S1.** Growth curves of industrial wine yeasts in YPD, YPS and YPGal, plus with the indicated inhibitor.
