# Supplementary material
Source: MDPI journal article supplement (https://www.mdpi.com/2311-5637/7/3/181)
Supplement: s1 [file s1]

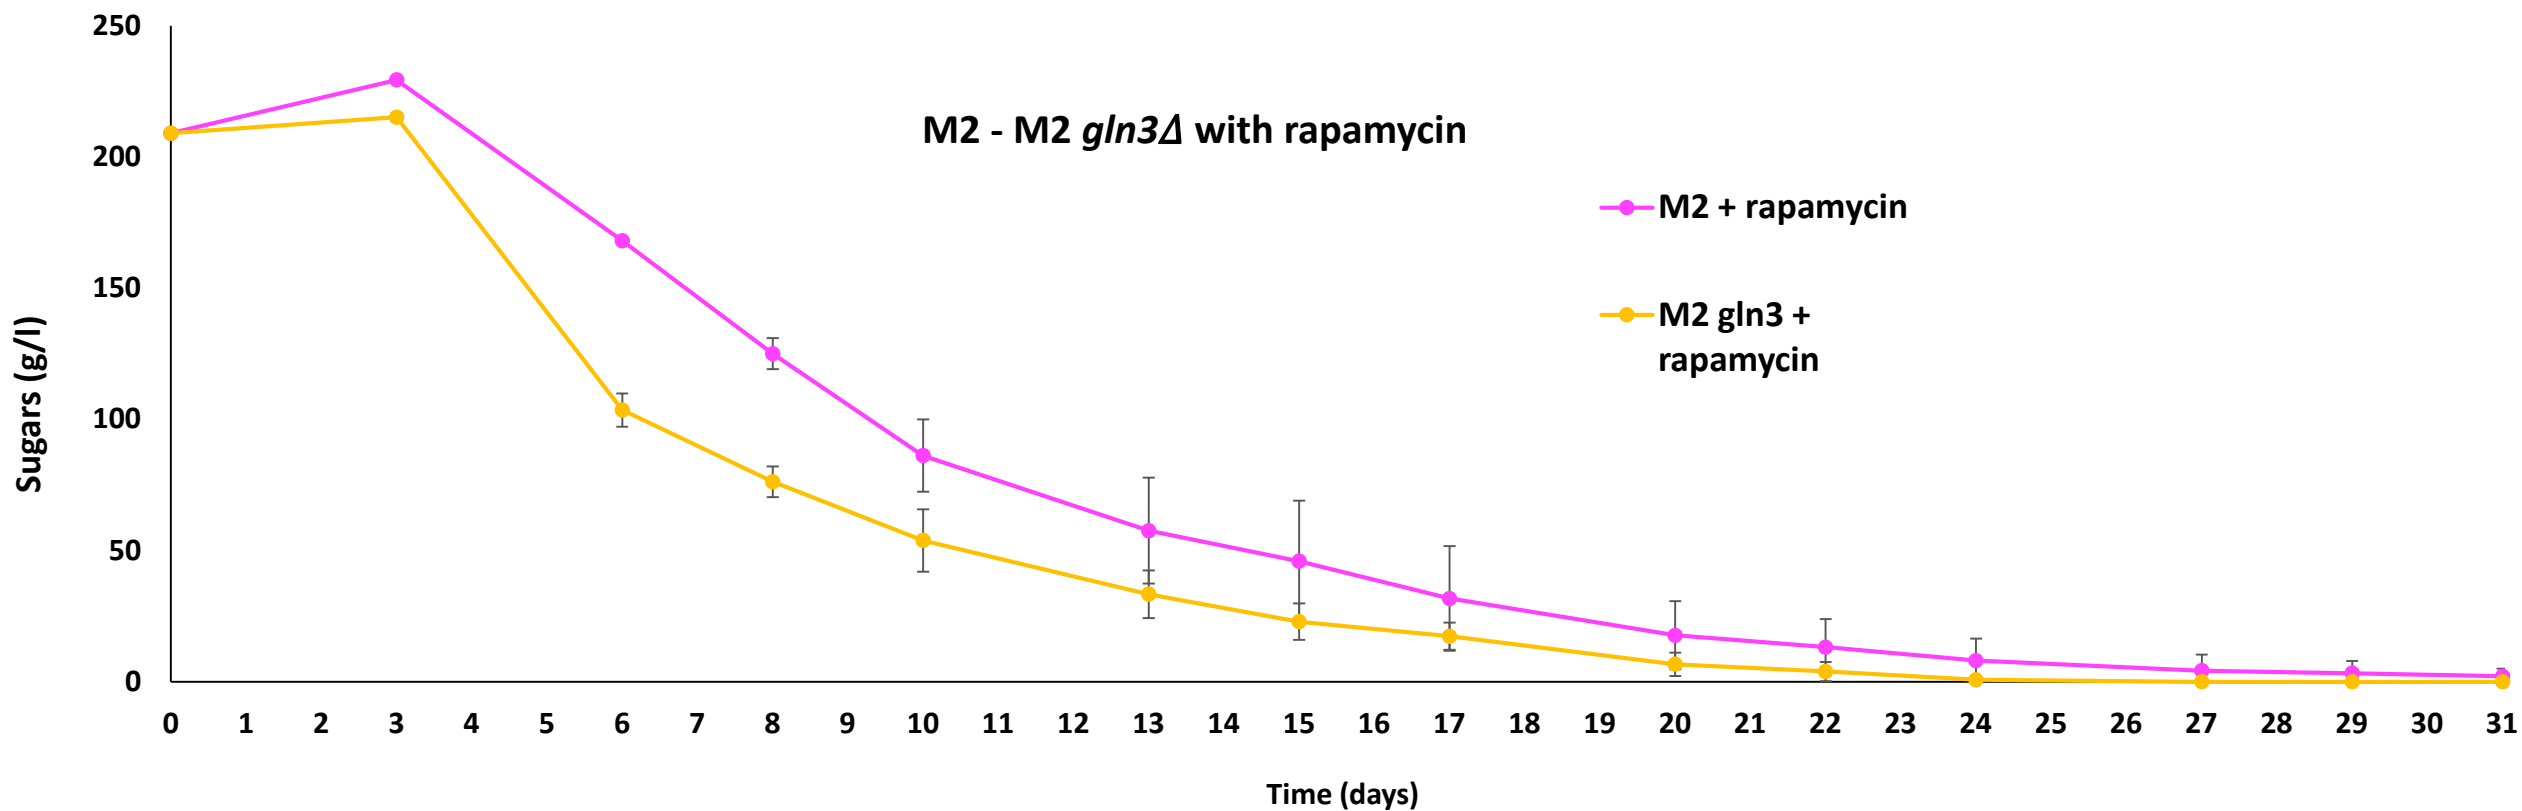

Supplementary Figure S3. MS300 synthetic grape juices fermentation of M2 and M2 *gln3*Δ strains in the presence of 200 nM rapamycin. Conditions as in Figure 6.
