# Supplementary material
Source: MDPI journal article supplement (https://www.mdpi.com/2311-5637/7/3/181)
Supplement: s1 [file s1]

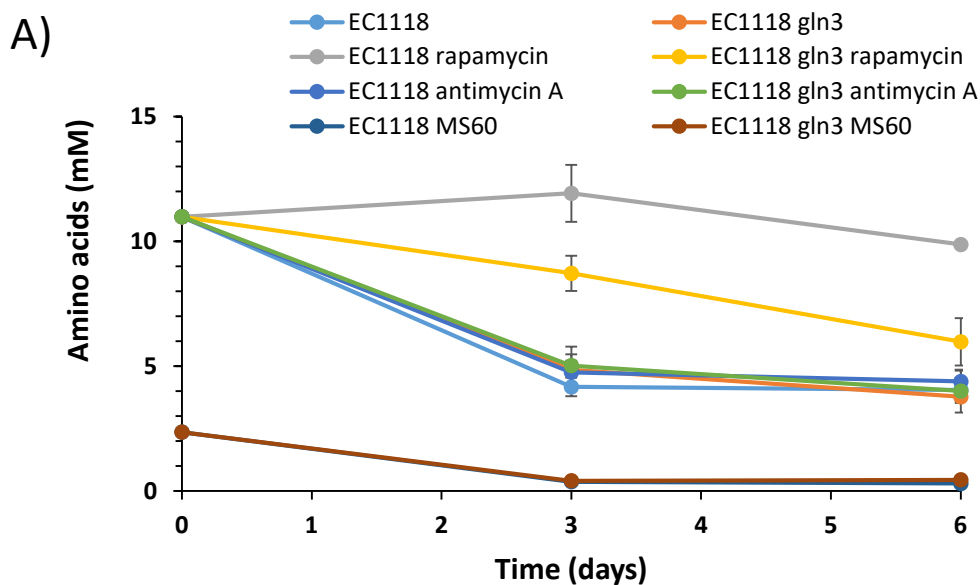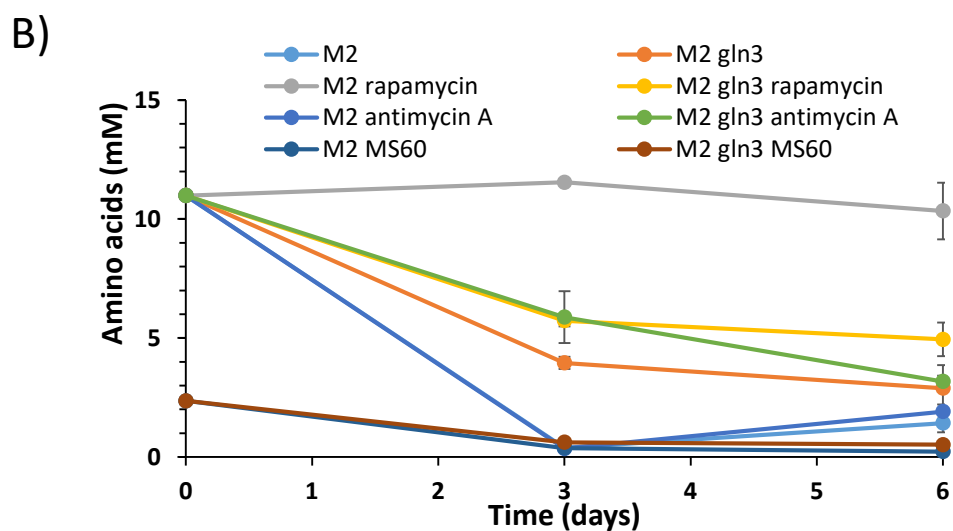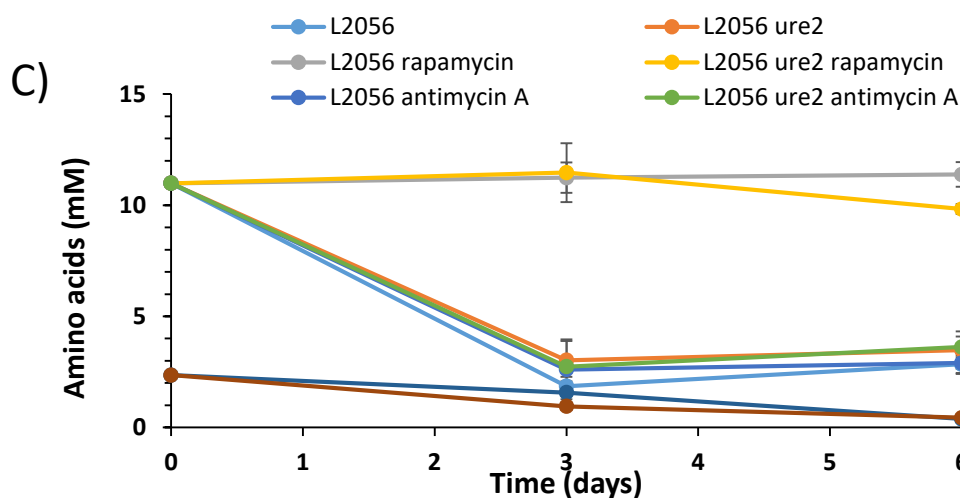

Supplementary Figure S2. Cuatification of  $\alpha$ -amino acids of the vinifications described at Figure 6.
